# Supplementary material for: Assessing the impact of CO 2 equilibrated ocean alkalinity enhancement on microbial metabolic rates in an oligotrophic system
Source: Copernicus journal article supplement (doi:10.5194/egusphere-2023-2409), 2023-10-18
Supplement: Supplementary file 1 [file egusphere-2023-2409-supplement.pdf]

SUPPLEMENTARY MATERIALS

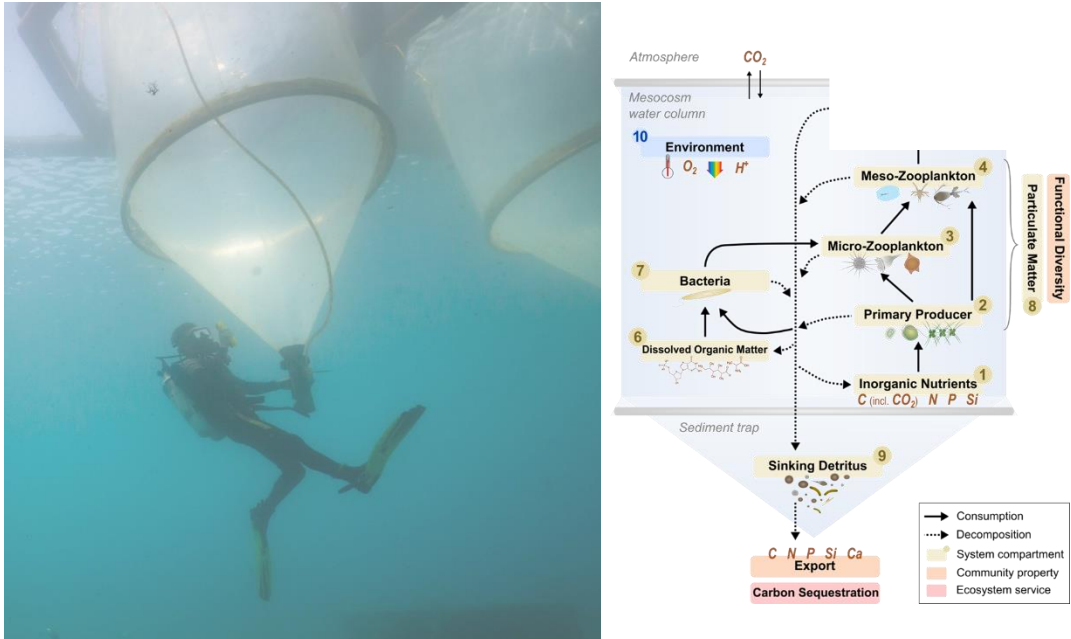

Figure S1. Picture and diagram of the mesocosms used in the current experiment. Left photograph by Dr. Michael Swatt and right diagram by Dr. Silvan Goldenberg.

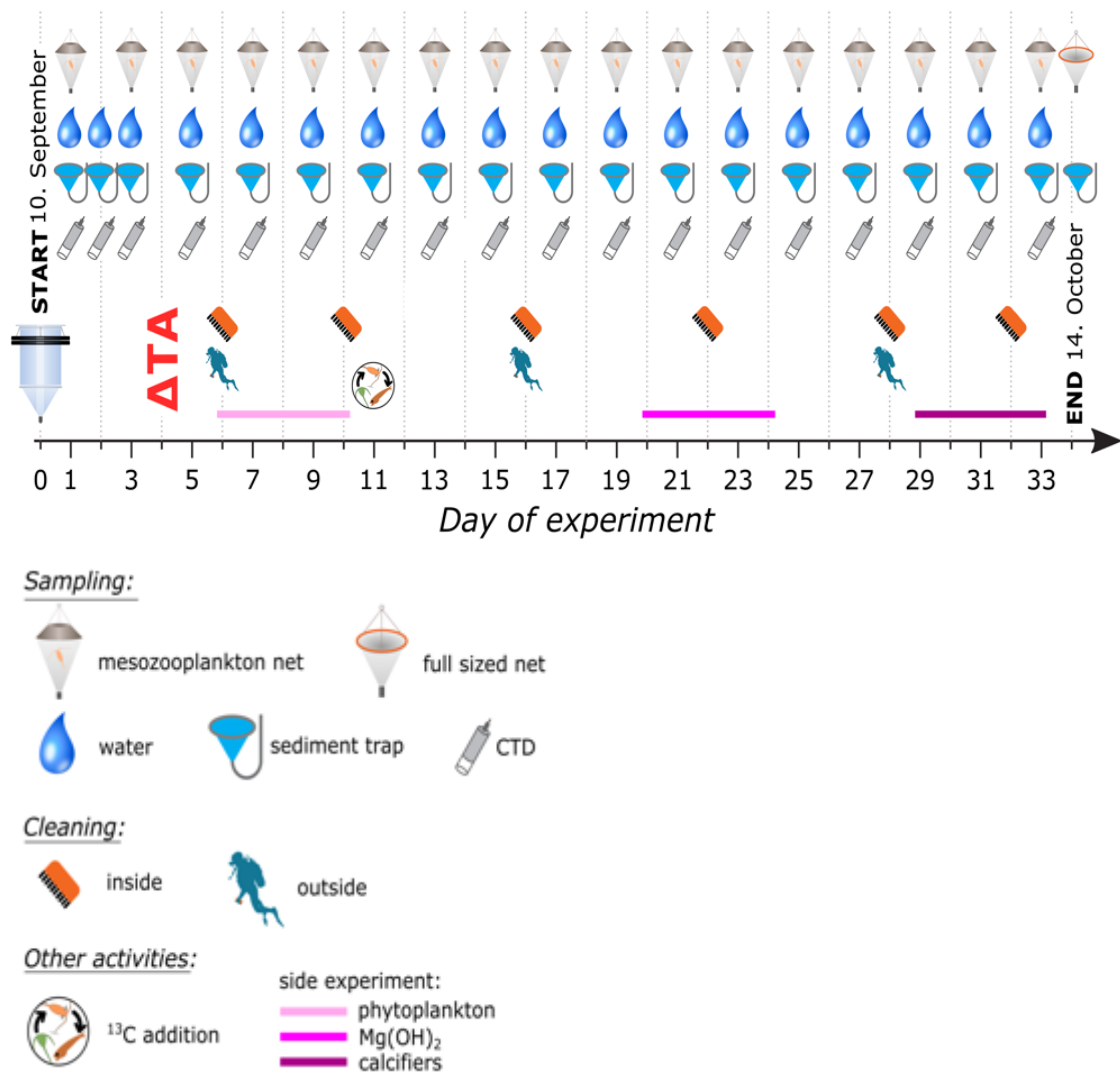

Figure S2. Activities conducted throughout the experimental period including, mesozooplankton and full-sized net casts, “water” meaning sampling for all parameters into the canisters or other parameter specific bottles, CTD casts, inside and outside cleaning of the mesocosm bags,  $^{13}\text{C}$  spiking and side experiments. Figure proportioned by Dr. Silvan Goldenberg.

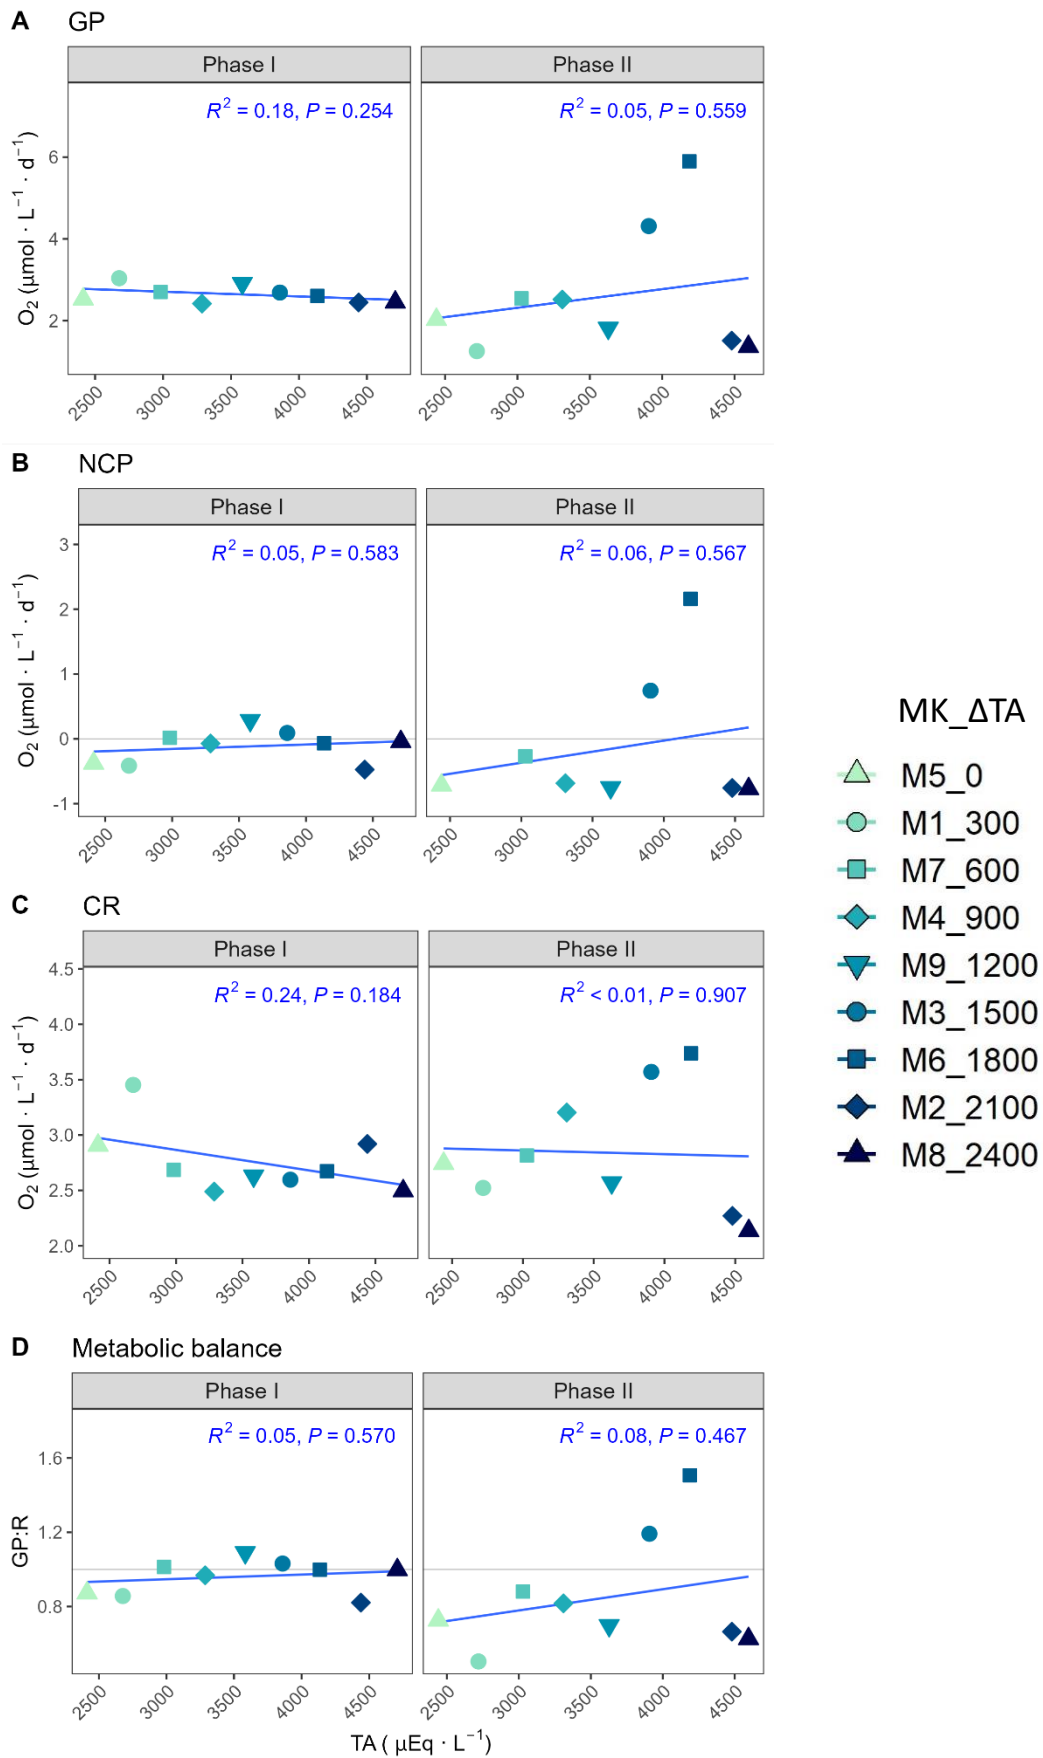

Figure S3. Phase-averaged linear regressions of A) Gross Production (GP), B) Net Community Production (NCP), C) Community Respiration (CR) and D) metabolic balance (GP:CR).

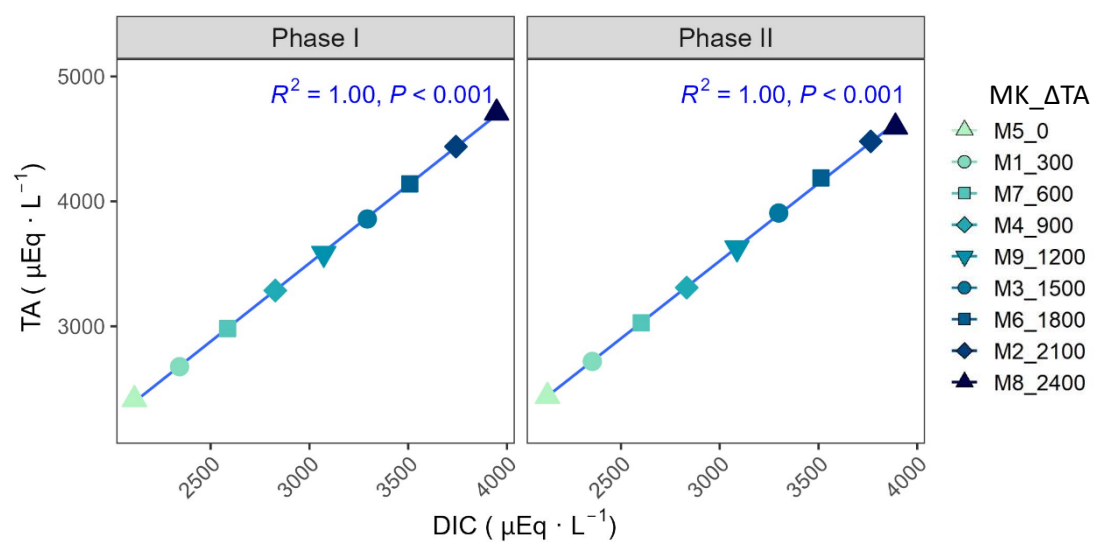

Figure S4. Linear regression between the post treatment averaged-out values for TA and DIC, obtained for each phase.

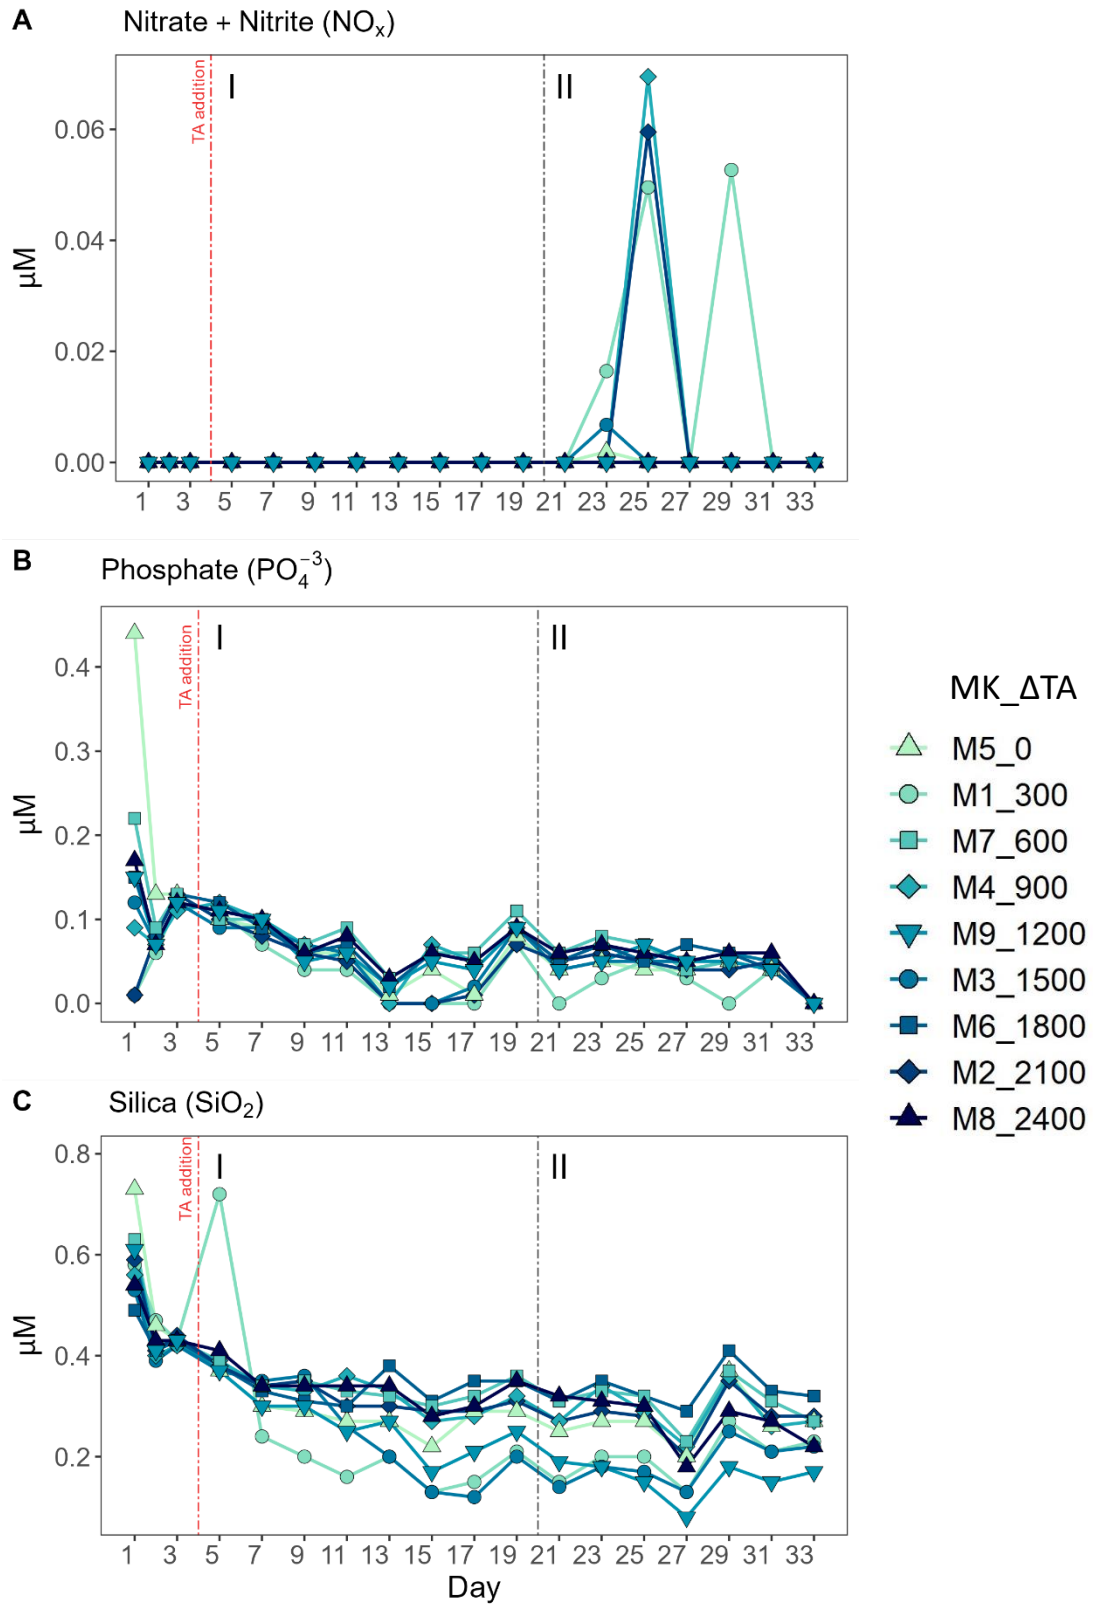

Figure S5. Temporal development of the A) nitrate+nitrite, B) phosphate and C) silica in situ concentrations.
