# Supplementary material for: Assessing the impact of CO 2 equilibrated ocean alkalinity enhancement on microbial metabolic rates in an oligotrophic system
Source: Copernicus journal article supplement (doi:10.5194/egusphere-2023-2409), 2023-10-18
Supplement: Supplementary file [file egusphere-2023-2409-AC1-supplement.pdf]

Specific comments addressed:

### **Title**

The title of the manuscript puts emphasis on testing an oligotrophic system, but not much relevance was given in the introduction and discussion sections to the importance and particularities of these oligotrophic regions. Moreover, information concerning the nutrient concentrations during the experiment is not evident, since the Supplementary Figures are not cited in the manuscript (please correct this).

Emphasis is given to carrying out the experiment in an oligotrophic system in the title because the goal was to simulate ocean liming. The latter has been generally discussed to consist of injecting alkalinity to the open ocean surface. Therefore, the Canary Islands were chosen due to their oligotrophic nature and resemblance to an open ocean system. This has been further clarified in the introduction (P2, line 74 and P3, line 103) and it was stated at the beginning of the discussion (P17, line 390). The nutrient concentration temporal development (Supp. Fig S1, before it was S2), has been cited in the introduction, in the methods section and in the discussion.

P. 1, lines 5- Correct formatting of the coma after Stephen D. Archer.

Corrected.

### **Introduction**

P. 2, line 56: The citation “National Academies of Sciences, Engineering and Medicine, (2021) is not in the reference list.

Corrected.

P. 2, line 72: The citation “Renforth & Henderson (2017)” is not in the reference list.

Corrected.

P.3, line 97: What is meant by “first step”? A few other studies have considered the effects of ocean alkalinity enhancement. Please improve phrasing for clarity.

This comment has been addressed by specifying the scale of this experiment. Because this experiment is the first one at a mesocosm scale on ocean alkalinity enhancement, we the authors considered it wise to simulate a best-case scenario. Which is why this (“first step”, changed to “first attempt”) was specifically mentioned.

### **Material and Methods**

P. 4, line 122: Please add n and Standard Deviation or Standard Error associated with the presented averages.

Corrected, standard errors were added to the table. We would like to thank the reviewer because another mistake was noticed. The averages in the previous version of the manuscript included the entire experiment. In this second version, the days prior to the addition were excluded from the calculations.

P. 4, lines 123 to 125: To calculate the carbonate system it is also necessary to know phosphate and silicate concentrations, please add the values used and refer to other potential publication or refer to Figure S5 in Supplementary Material.

We included a citation to the Supplementary Material Figure that portrays the temporal development of the nutrient concentrations. Due to this, the order of the supplementary figures was corrected. Now this supplementary figure is number S1.

P. 4, line 125: The citation “Uppström (1974)” is not in the reference list.

Corrected.

P. 4, line 126: The salinity used to calculate the carbonate system before and after the manipulation of total alkalinity was the same? Please add the difference caused by the manipulation and justify for not using the specific salinities.

Salinity throughout the study mildly increased due to evaporation although it remained overall quite constant. To convey the evaporation effect, after day 17 (which marks approximately the middle of the experiment) the salinity in said calculations was increased. It is true that the salinity increased slightly due to the addition of  $\text{NaHCO}_3$ , and  $\text{Na}_2\text{CO}_3$ . In the corrected table, the portrayed averages were calculated based on non-normalized carbonate chemistry parameters. Meaning, the latter were calculated with the *in-situ* salinity values.

P. 4, line 129: The word “(italics)” is unnecessary.

Corrected.

P. 4, line 131: Specify the pH scale and format “p” of “pCO<sub>2</sub>” to italic (throughout the manuscript).

Corrected.

P. 4, line 134: The reference to “pseudo random order” needs further clarification, since this term is used when an algorithm is applied to produce sequences of random numbers.

We addressed this comment by changing “pseudo random” to “random” order. We also explained that the treatments were the ones arranged in random order, the mesocosms along the pier did go from 1 to 9.

P. 4, lines 141 to 143: Considering the novelty of the study, it is important to provide more detailed information on the accuracy of the alkalinity manipulation, such as, effects related to increasing TA levels, the time between sampling and measurements, and potential precipitation effects.

An overview publication (Paul et al., 2024) about this study that has been accepted for public discussion in the same special issue, is addressing this in more detail.

P. 5, line 152: The citation “Bryan et al. (1976)” is not in the reference list.

Corrected.

P. 5, line 168: The collection of an integrated 2.5 m sample provides information of the communities that occur from 0 to 2.5 m depth. If the referred light intensity range was measured below the screen, the communities were exposed to very high light intensities. **Hence, it would be useful to state the time frame to which the organisms were exposed to this high light intensity (~2300  $\mu\text{mol m}^{-2} \text{s}^{-1}$ ). Furthermore, elaborate on the choice of the screen.**

The mesocosms used enclosed only the top 2.5 m of the water column. We chose this screen because it mimics the natural attenuation at roughly 1m depth and thus better represents the light conditions at approximately the middle of water column inside the mesocosms, compared to full direct daylight (i.e. surface values more or less). Natural light variability during the experimental period was high, which is why we chose to state the range of light intensity instead of the average value. We thought the range of exposure was more important to mention because it gives an idea of the natural light variability to which mesocosms, and incubators were exposed. The highest intensities (~2300  $\mu\text{mol m}^{-2} \text{s}^{-1}$ ) were mostly observed between noon and 15:00 during the last week of the experiment (T25 onwards), and in other sporadic occasions, which is why we did not consider the need to state this.

P. 6, line 187: The citation “Cermeño et al. (2012)” is not in the reference list.

Corrected.

P. 6, lines 192 to 193: This sentence should appear before, perhaps in line 189.

Corrected.

P. 7, line 238: It would be useful to have information about the groups that were defined with flow cytometry, in the Material and Methods section. This will facilitate the discussion.

We thank the reviewer for their suggestion, the requested information was added to the methods section.

P. 7, line 250: The citation “Wickham (2016)” is not in the reference list

Corrected.

## Results

P. 7, line 255: The graphs might be misleading in relation to the end of the so-called stable period, is it day 20 or 21? Moreover, with the exception of the highest treatment, where precipitation occurred, both TA and DIC were stable until the end of the experiment according to Figure 1. Please elaborate.

Vertical dotted lines mark the time of alkalinity addition on day 4 and the point at which phase-I transitions to phase-II on day 20. Yes, carbonate chemistry was stable in all treatments throughout except the highest one. The distinction between phase I and phase II was based on a change in the biological response, evident in many of the variables measured, rather than on a change in the alkalinity in any of the treatments. We agree, our original text did imply that the phase transition was based on the change in

alkalinity dynamics in the highest treatment – this is not the case and we have clarified this.

P. 8, line 272: Please adjust the graphs to the same dimensions to facilitate comparison and add a break symbol to call attention that the axis is not starting with 0. The legend of the X axis of this Figure and others would improve by modifying it to Time (d) or Elapsed time (d).

Corrected. This x axis nomenclature will be used in complementary publications thus we find it appropriate to leave it as is. However, it has been further clarified in all the temporal development figure captions by adding the following sentence at the end: The X-axis represents the number of days elapsed since the beginning of the experiment.

P. 8, line 277: Improve phrasing for clarity.

Corrected. The start of this section was changed to: Another reason for the delineation of the mentioned phases (I: days 5-19, II: days 21-33) is the observed increase in production and chlorophyll-a concentration in specific intermediate treatments after day 20 when compared to phase I (Figure 2). This division of the experimental period was chosen to facilitate the interpretation of the system's response.

P. 9, line 284: Improve the figure caption of Figure 2 by adding “the temporal development” after “... oxygen production and consumption showing...” and removing it from the descriptions of the graphs A, B, C and D.

Corrected.

P. 10, line 289: Chlorophyll a should be represented with the “a” in italic here and throughout the manuscript.

Corrected.

P. 10, line 291: The authors refer to “differences”, are these differences statistically significant? Please add information.

No, they were not. This comment has been addressed by specifying that visually these differences occur, although they are not significant.

P. 11, line 295: Improve phrasing for clarity.

This comment was addressed by separating the sentence that starts on line 295 (now line 305) into two sentences.

P. 11, lines 298 to 300: If the data was not collected, what does the data point refer to? Improve phrasing for clarity.

The sentence was rephrased as:

(Now line 309) Data for PP on day 27, when oxygen production and Chl*a* concentration in  $\Delta 1800$  reached the highest levels recorded throughout the entire experiment for all mesocosms, were not collected. Consequently, the peak in  $\Delta 1800$  reflected by Chl*a* (Figure 4A and B), as well as the GCP and NCP rates (Figure 2), which surpassed those in  $\Delta 1500$ , was excluded (Figure 4C and D).

P. 11, line 300: Improve figure caption for clarity.

Corrected. The figures were cited in sequential order within the caption. It was clarified that 'Chla' stands for total chlorophyll-a, and explicit specifications were added for the nano size range as well as the acronym 'PP,' which refers to primary production.

P. 11, line 305: Could be useful to present a graph to support the statement.

Since this article is not meant to focus on community structure changes much, we felt that the statistics alone were enough evidence. A complementary publication that is currently in preparation will likely provide this information.

P. 12, line 312/3: Considering that the manuscript is testing potential relationships in relation to TA enhancement it would be useful to either have an additional axis showing TA or indication in the text of the reasoning behind using DIC (more biologically relevant).

The reason behind using the DIC gradient in the analyses performed to test a non-linear response of the metabolic rates and Nano contributions and abundances, is stated in line 344 of the new manuscript (“TA and DIC, in an equilibrated OAE approach, vary together (as TA increases, so does DIC; Supp. Fig. S5) and, if a potential non-linear response between the metabolic parameters listed in Table 2 were to be considered, the driver behind these relationships would most likely be DIC (key substrate for carbon fixation; Badger et al., 1998), not TA”).

P. 12, line 312/3: Add space after Figure 5. Cell abundances of the nanoeukaryotes seem high for the region and nutrient / Chla concentrations found, please re-check.

Thank you for noticing. Yes, they were too high. The calculations were revised, and we noticed that there was a mistake in the applied flow rate for the estimates. It has now been corrected.

P. 12, lines 315 to 316: Add Figure number to Nanoeukaryote (1) and Nanoeukaryote (2). The text should be improved for fluidity, namely reference to the figure and graphs should be cited in the text and sequentially (change the order of the graphs in the Figure or in the text). Moreover, there should be an introductory sentence relating to the observed trends in primary production and metabolic balance. Finally, in the discussion section, the dominant species of certain data points are presented, but there is no information about the initial community.

Figure numbers/letters were specified for the two nano populations separately in the caption. Furthermore, the sentence “The two latter correspond to two different nanoeukaryote populations” was added right after listing what each figure from A to D represents.

The order in which the figures in Figure 6 are cited in the text was changed (Figure 6A to 6D are sequentially referenced).

Two introductory sentences summarizing the results portrayed in the previous sections were added: “The second phase of the experiment was characterized by an increase in production and Chla concentrations in all intermediate treatments below the two highest and above the two lowest treatments, except  $\Delta 1200$ . While phase I was distinguished by

extremely low GP, NCP, PP rates and Chl<sub>a</sub> throughout and across all mesocosms. (line 329-332)”

Exemplary samples for microscopy had been analyzed at the time for those days to determine what species was growing. Data on the initial community, besides what is provided here, were not made available to us. These data will contribute to a complementary research publication addressing community structure changes specifically.

P. 13, lines 342 to 343: Elaborate on the need to have the terms nanophytoplankton and nanoeukaryote.

To prevent confusion with terminology, we adopted the terms picoplankton, nanoplankton, and microplankton when referring to the size fractions of Primary Production (PP) and Chlorophyll-a (Chl<sub>a</sub>), avoiding the use of the term 'nanophytoplankton.' Specifically, the terms nanoeukaryotes (1) and (2) denote clusters of phytoplankton identified within the nanoplankton fraction. These clusters encompass both autotrophic and mixotrophic flagellates, with the latter corresponding to larger cells exhibiting yellow fluorescence. Another reason for the use of different terminology to refer to these two datasets was to distinguish them when referenced.

P. 14, lines 353 to 355: Improve sentence.

Corrected. The end part of the sentence was placed at the beginning.

## **Discussion**

P. 16, lines 376 to 377: Specify what portion of the community is considered in this sentence.

Corrected.

P. 16, line 380: Please add that 4500  $\mu\text{mol kg}^{-1}$  is the final TA concentration.

Corrected.

P. 16, lines 382 to 384: Improve phrasing and remember that there were significant differences in part of the community. Moreover, it is important to question, whether the small changes observed might have a long-term effect on the functioning of the microbial communities.

The reviewer raises a good point, the long-term effect evaluation represents a limitation in many studies, including mesocosm experiments like the one conducted here. This aspect is explicitly addressed in the opening sentence of the “4.2 Challenges and Limitations...” discussion section. However, since the slight response observed is novel and disappears by the end of the study, this aspect is not further discussed because it may be based on too many assumptions. Due to this and other reasons, we conclude that further research is required. Nonetheless, we have added a sentence at the end of section 4.1 addressing it.

P. 16, lines 386 to 388: Care should be given when comparing oligotrophic versus eutrophic environments loosely, since communities vary seasonally, with consequences to the initial community.

The text included in this portion of the discussion alludes to pending hypotheses since OAE has been hardly studied to this point. Based on said hypotheses, we argue that nutrient limitation may have concealed a clearer/stronger response, and we wanted to emphasize key knowledge gaps that remain. The goal thus was not necessarily to compare eutrophic versus oligotrophic, since we agree these terms do not only describe the environmental conditions of a system, but also the community it can sustain, which are both highly variable with time. It was to point out some hypotheses about biotic responses in eutrophic systems in support of the idea that, in the current experiment, the highly oligotrophic conditions could have limited the community's response. We have added a sentence in this section explicitly stating that research on OAE impacts in oligotrophic systems at a comparable scale does not exist. Right before mentioning eutrophic environments.

P. 17, line 406: Which results? Do the authors have information to go into more detail than the group nanophytoplankton?

We have now clarified which results are being referred to.

P. 17, line 408: The two studies considered tested different TA ranges. Therefore, one should compare within the range to which both have data for.

We thank the reviewer for this insightful comment. We addressed it by comparing the results from our study with Ferderer, et al.'s (2022) in more detail. We found a mistake in the result interpretation carried out for the latter study. Therefore, we discuss this point differently. We hope the reviewer considers the new text to be appropriate and well discussed.

P. 18, lines 421 to 423: Please improve the sentence for clarity. What is meant with accumulation of inorganic nutrients? How is it related to the nitrogen cycle?

The first portion of the comment was addressed by changing "accumulation of inorganic nutrients" to "an increase of inorganic nutrients in relation to the TA manipulation, potentially caused by enhanced nutrient cycling". We believe that a possible explanation for the observed long-term response is that the slight increase in pH favored heterotrophic organic nitrogen turnover. We state this a few lines down (P19, line 433) after relating our results with those from Paul, et al (2024), which is a publication about the same study that is in preparation. We find that comparing their results with ours is key to providing a potential explanation for the observed response in production and its timing. We also added a citation to Sup. Fig S2 where nutrient concentrations are provided and NO<sub>x</sub> clearly increases in the second phase which would further support the aforementioned explanation.

P. 19, lines 461: Elaborate on "...ion strength tolerance...".

To address this comment, we extended this sentence changing it to: "This is likely due to species-specific ionic strength tolerance, indicating their capacity to adapt and thrive in varied bicarbonate ion concentrations, potentially explaining the observed threshold"

P. 20, line 496: Citation (Morse and He, 1993) is not in the reference list. Please change “and” to “&” to uniformize formatting.

Corrected.

P. 21, line 516: Remove “; “from the citation (Bach et al., 2019).

Corrected.

P. 21, Conclusions: Despite the relevance of primary production differences, these are not referred in the conclusions, while “...minor changes in species composition...” are emphasized but the work focused on groups. Please improve the section accordingly.

We thank the reviewer for this comment and fully agree. We removed the part about minor changes in species composition since, as mentioned above, it is not the main focus of this study. Then changed the following portion of the conclusions to: “...In fact, we observed a potential co-benefit in the form of increased microbial community and primary production up to a specific threshold. This increase could be driven either indirectly by the rise in pH, enhancing nitrogen cycling and consequently inorganic nutrient availability, or by the carbonate chemistry conditions, specifically Dissolved Inorganic Carbon (DIC) availability., our discovery of a non-linear, optimal curve-like response in microbial production rates to the applied DIC gradient (as shown in Table 2) is noteworthy. ...”

P refers to page. Line counts continue throughout the manuscript.

## References

- Badger, M. R., Andrews, T. J., Whitney, S. M., Ludwig, M., Yellowlees, D. C., Leggat, W., & Price, G. D. (1998). The diversity and coevolution of Rubisco, plastids, pyrenoids, and chloroplast-based CO<sub>2</sub>-concentrating mechanisms in algae. *Canadian Journal of Botany*, 76(6), 1052–1071. <https://doi.org/10.1139/b98-074>
- Paul, A. J., Haunost, M., Goldenberg, S., Sanchez, N., Schneider, J., Suitner, N., & Riebesell, U. (2024). *Ocean alkalinity enhancement in an open ocean ecosystem: Biogeochemical responses and carbon storage durability*. *March*, 1–31.
